# Supplementary material for: Inductive Heating Using a High-Magnetic-Field Pulse to Initiate Chemical Reactions to Generate Composite Materials
Source: PubMed Central journal article supplement (PMC6473677; doi:10.3390/polym11030535), 2019-03-21
Supplement: polymers-11-00535-s001.pdf [file polymers-11-00535-s001.pdf]

## IR Identification of PC, ODA, and Their Reaction Products

### Abbreviations for band assignments

v...stretching vibration  
 $\delta$ ...deformation vibration  
 $\omega$ ...wagging vibration  
 $\rho$ ...rocking vibration  
 $\gamma$ ...scissoring vibration  
as...asymmetric  
s...symmetric  
o.o.p....out of plane  
i.p....in plane

### Abbreviations for band intensities

vw...very weak; w...weak; m...medium; strong; vs...very strong

**Table S1.** Assorted band assignments of Bisphenol-A based Polycarbonate (PC).

| Wavenumber (cm <sup>-1</sup> )                      | Band assignment                                           | Intensity | Molecular structure             | References |
|-----------------------------------------------------|-----------------------------------------------------------|-----------|---------------------------------|------------|
| 3046                                                | $\nu$ CH                                                  | w         | aromatic ring (Ar)              | [1,3]      |
| 2970                                                | $\nu_{as}$ CH                                             | m         | CH <sub>3</sub>                 | [1,3]      |
| 2870                                                | $\nu_s$ CH                                                |           | CH <sub>3</sub>                 | [3]        |
| 1775 (dubl.<br>1785 trans-cis,<br>1767 trans-trans) | $\nu$ C=O                                                 | s         | -O-(C=O)-O-,<br>Ar-O-C(=O)-O-Ar | [2,4,6]    |
| 1600                                                | $\delta_s$ CH,<br>$\nu_{ip}$ CC<br>$\nu$ CC               | vw        | aromatic ring                   | [3–5]      |
| 1505                                                | $\nu$ C-C<br>$\delta_{as}$ CH, Dublett,<br>$\nu$ CC       | s         | aromatic ring                   | [2,3]      |
| 1462                                                | $\delta$ CH, $\nu$ C=C,<br>$\delta_{as, i.p.}$ CH         | vw        | CH <sub>3</sub>                 | [3,5]      |
| 1409                                                | $\delta_{as, i.p.}$ C-H                                   | vw        | CH <sub>3</sub>                 | [3]        |
| 1388                                                | $\delta_s$ CH,<br>$\delta_{s, i.p.}$ CH                   | vw        | CH <sub>3</sub>                 | [5,7]      |
| 1365                                                | $\delta_{as}$ CH, Dublett,<br>$\delta_{s, i.p.}$ CH       | vw        | CH <sub>3</sub>                 | [3,5]      |
| 1227                                                | $\nu_{as}$ COC, $\delta$ C=O,<br>$\nu$ O-C(O)-O           | vs, broad | -O-(C=O)-O-, aromatic ring      | [3,5,6]    |
| 1191                                                | $\nu_{as}$ O-C(O)-O,<br>$\omega_{i.p.}$ CH,               | vs        | -O-(C=O)-O-,                    | [3,5,6]    |
| 1168                                                | $\nu$ O-(C=O)-O,<br>$\nu$ COC, C-C,<br>$\omega_{i.p.}$ CH | s         | -O-(C=O)-O-, aromatic ring      | [1,3,5,6]  |
| 1102                                                | $\delta_{i.p.}$ CH                                        | w         | aromatic ring                   | [3]        |
| 1080                                                | $\gamma$ CCC, $\delta$ CH                                 | m         | aromatic ring                   | [2]        |

|      |                                                            |   |                            |         |
|------|------------------------------------------------------------|---|----------------------------|---------|
| 1009 | $\nu_s$ OCO, $\nu$ OC                                      | s | -O-(C=O)-O-, aromatic ring | [1-3,5] |
| 884  | $\nu$ C-C, $\delta_{o.o.p.}$ CH                            | w | C-CH <sub>3</sub>          | [3,5]   |
| 830  | $\delta_{o.o.p.}$ CH,<br>$\omega$ CH, $\gamma_{o.o.p.}$ CH | m | aromatic ring              | [2,3]   |

1. Dechant, J. *Ultrarotspektroskopische Untersuchungen an Polymeren*; Akademie-Verlag: Berlin, Germany, 1972.
2. Kraus, R.G.; Emmons, E.D.; Thompson, J.S.; Covington, A.M. *J. Polym. Sci Part P Polym. Phys.* **2008**, *46*, 734–742.
3. Asensio, R.C.; Moya, M.S.A.; de la Roja, J.M.; Gomez, M. *Anal. Bioanal. Chem.* **2009**, *395*, 2081–2096.
4. Heymans, N.; Dequenne, B. *Polymer* **2001**, *42*, 5337–5342.
5. Lee, S.-N.; Stolarski, V.; Letton, A.; Laane, J. *J. Mol. Struct.* **2000**, 52119–52123.
6. Sweileh, B.A.; Al-Hiari, Y.M.; Kailani, M.H.; Mohammad, H.A. *Molecules* **2010**, *15*, 3661–3682.
7. Abbate, M.; Martuscelli, E.; Musto, P.; Ragosta, G.; Scarinzi, G. *J. Polym. Sci Part B Polym. Phys.* **1994**, *32*, 395–408.

**Table S2.** Assorted band assignments of Octadecylamine (ODA).

| Wavenumber (cm <sup>-1</sup> ) | Band assignment                    | Intensity | Molecular structure | References |
|--------------------------------|------------------------------------|-----------|---------------------|------------|
| 3331                           | $\nu_{as}$ NH                      | s         | NH <sub>2</sub>     | [1]        |
| 3255                           | $\nu_s$ NH                         | w         | NH <sub>2</sub>     | [1]        |
| 3173                           | 2 $\delta$ NH overtone<br>Amide II | m         |                     | [2]        |
| 2954                           | $\nu_{as}$ CH                      | m         | CH <sub>3</sub>     |            |
| 2917                           | $\nu_{as}$ CH                      | vs        | CH <sub>2</sub>     | [3]        |
| 2848                           | $\nu_s$ CH                         | s         | CH <sub>2</sub>     | [4]        |
| 1647                           |                                    | w         |                     |            |
| 1608                           |                                    | m         |                     |            |
| 1565                           | Amide II                           | m         |                     | [2,4]      |
| 1485                           | $\delta_{as}$ CH                   | m         | CH <sub>3</sub>     | [5]        |
| 1465                           | $\delta_{as}$ CH                   | m-s       | CH <sub>2</sub>     |            |
| 1437                           | $\delta_s$ CH                      | w-m       | CH <sub>2</sub>     | [3]        |
| 1380                           | $\delta_s$ NH                      | w         | CH <sub>2</sub>     | [3]        |
| 1307                           |                                    | w         |                     |            |
| 1150                           |                                    | w         |                     |            |
| 1113                           |                                    | w         |                     |            |
| 1060                           | $\nu$ CN                           | m         |                     |            |
| 1045                           |                                    | w         |                     |            |
| 894                            | $\rho$ CH                          | m         | CH <sub>2</sub>     | [3]        |
| 719                            |                                    | w         |                     |            |

1. Sokoll, R.; Hobert, H. *J. Chem. Soc. Faraday Trans. I* **1986**, *82*, 1527–1535.
2. Spange, S.; Wolf, S.; Simon, F. *Progr. Colloid Polym. Sci.* **2006**, *132*, 110–116.
3. Rivas, B.L.; Seguel, G.V.; Geckeler, K.E. *Die angewandte Makromolekulare Chemie* **1997**, *251*, 97–106.
4. Das, P.K.; Ruzmaikina, I.; Belfiore, L.A. *J. Polym. Sci Part B: Polymer Phys.* **2000**, *38*, 1931–1938.
5. Kraus, R.G.; Emmons, E.D.; Thompson, J.S.; Covington, A.M. *J. Polym. Sci Part P Polym. Phys.* **2008**, *46*, 734–742.

**Table S3.** Assorted band assignments of Bisphenol-A (BPA).

| Wavenumber (cm <sup>-1</sup> ) | Band assignment | Intensity | Molecular structure  | References |
|--------------------------------|-----------------|-----------|----------------------|------------|
| 3350                           | $\nu_{as}$ OH   | s, broad  | associated, H-bond   | [1]        |
| 3065                           | $\nu$ CH        | w         | aromatic ring        | [2]        |
| 3029                           | $\nu$ CH        | w         | aromatic ring        | [1]        |
| 2966                           | $\nu_{as}$ CH   | s         | CH <sub>3</sub>      | [1]        |
| 2871                           | $\nu_s$ CH      | s         | CH <sub>3</sub>      | [1]        |
| 1612                           |                 | s-m       | p-substituted aromat | [1]        |
| 1598                           |                 | s-m       | p-substituted aromat | [1]        |
| 1511                           |                 | s         |                      | [1]        |
| 1455                           |                 | s-m       |                      |            |
| 1363                           |                 | m         | C-CH <sub>3</sub>    | [1]        |
| 1178                           |                 | s         |                      | [1]        |
| 826                            |                 | m         |                      | [1]        |

1. Fei, B.; Chen, C.; Peng, S.; Zhao, X.; Wang, X.; Dong, L. *Polymer Int.* **2004**, *53*, 2092–2098.
2. Abbate, M.; Martuscelli, E.; Musto, P.; Ragosta, G.; Scarinzi, G. *J. Polym. Sci Part B Polym. Phys.* **1994**, *32*, 395–408.

**Table S4.** Assorted band assignments of urethane.

| Wavenumber (cm <sup>-1</sup> ) | Band assignment                              | Intensity | Molecular structure                               | References   |
|--------------------------------|----------------------------------------------|-----------|---------------------------------------------------|--------------|
| 3453                           | v NH                                         | w         | non H-bonded                                      | [1]          |
| 3381                           | v NH, Ar-O-C(=O)-NH-R                        | m         | H-bonded                                          | [2,3]        |
| 3330-3320                      | v NH                                         | w         | H-bonded                                          | [1]          |
| 3280                           | v NH                                         | sh, w     | H-bonded                                          | [1]          |
| 3060                           | v CH                                         | vw        | aromatic ring                                     |              |
| 1715-1690                      | v C=O                                        | s         | aliphatic-aromatic H-bond, non H-bond             | [1,4,5,8–11] |
| 1530                           | γ N-H+v C-N, Ar-O-C(=O)-NH-R                 | s-m       | secondary urethanes                               | [1,4,6,13]   |
| 1506                           | v C-C, ring                                  | m         | secondary urethanes, associated or in solid phase | [4]          |
| 1470                           | γ NH + v CN, γ CH aliphatic, Ar-O-C(=O)-NH-R | m         | γ CH <sub>2</sub> + ω CH <sub>2</sub>             | [7]          |
| 1387                           | δ <sub>s</sub> CH, δ <sub>s, i.p.</sub> CH   | vw        | CH <sub>3</sub> , compare to Polycarbonate        |              |
| 1220                           | v CN, v CO                                   | s-m       | secondary urethanes, associated or in solid phase | [7,12,13]    |
| 1170                           | v as COC                                     | s         |                                                   | [7,13]       |
| 1080                           | v COC                                        | m         | v s C-O-C aliphatic,                              | [7,13]       |
| 1020                           | v COC, v CN, aliphatic, Ar-O-C(=O)-NH-R      | m         |                                                   | [7,13]       |

1. McCarthy, S.J.; Meijs, G.F.; Mitchell, N.; Guntillake, P.A.; Heath, G.; Brandwood, A.; Schindhelm, K. *Biomaterials* **1997**, *18*, 1387–1409.
2. Yu, S.; Ma, M.; Liu, J.; Tao, J.; Liu M.; Gao, C. *J. Membr. Sci.* **2011**, *379*, 164–173.
3. Li, M.-S.; Ma, C.-C.M.; Lin, M.-L.; Lu, M.-S.; Chen, J.-L.; Chang, F.-C. *Polymer* **1997**, *38*, 845–853.
4. Lin, M.-L.; Chang, K.-H.; Chang, F.-C.; Li, M.-S.; Ma, C.-C.A. *J. Polym. Sci. Part B Polym. Phys.* **1997**, *35*, 2183–2191.
5. Günzler, H.; Gremlich, H.-U. *IR-Spektroskopie - Eine Einführung*; Wiley-VCH: Weinheim, Germany, 2000.
6. Lee, S.-N.; Stolarski, V.; Letton, A.; Laane, J. *J. Mol. Struct.* **2000**, *521*, 19–23.
7. Mendoza-Payan, J.G.; Gallardo, S.F.; Marquez-Lucero, A. *Sens. Actuators B* **2009**, *142*, 130–140.
8. Coleman, M.M.; Lee, K.H.; Skrovanek, D.J.; Painter, P.C. *Macromolecules* **1986**, *19*, 2149–2157.
9. Corcuera, M.A.; Rueda, L.; Fernandez d'Arlas, B.; Arbelaiz, A.; Marieta, C.; Mondragon, I.; Ecaiza, A. *Polym. Degrad. Stab.* **2010**, *95*, 2175–2184.
10. Coleman, M.M.; Skrovanek, D.J.; Hu, J.; Painter, P.C. *Macromolecules* **1988**, *21*, 59–65.
11. Dechant, J. *Ultrarotspektroskopische Untersuchungen an Polymeren*; Akademie-Verlag: Berlin, Germany, 1972.
12. Nyquist, R.A.; Potts, W.J. *Spectrochim. Acta* **1961**, *17*, 679–697.
13. Socrates, G. *Infrared and Raman Characteristic Group Frequencies*, 3rd Ed.; Wiley: Hoboken, NJ, USA, 2001.
